# Supplementary material for: SC75741, A Novel c-Abl Inhibitor, Promotes the Clearance of TDP25 Aggregates via ATG5-Dependent Autophagy Pathway
Source: PubMed Central journal article supplement (PMC8586708; doi:10.3389/fphar.2021.741219), 2021-10-29
Supplement: DataSheet1.pdf [file DataSheet1.pdf]

## Supplementary Material

### Supplementary Figures

Figure S1

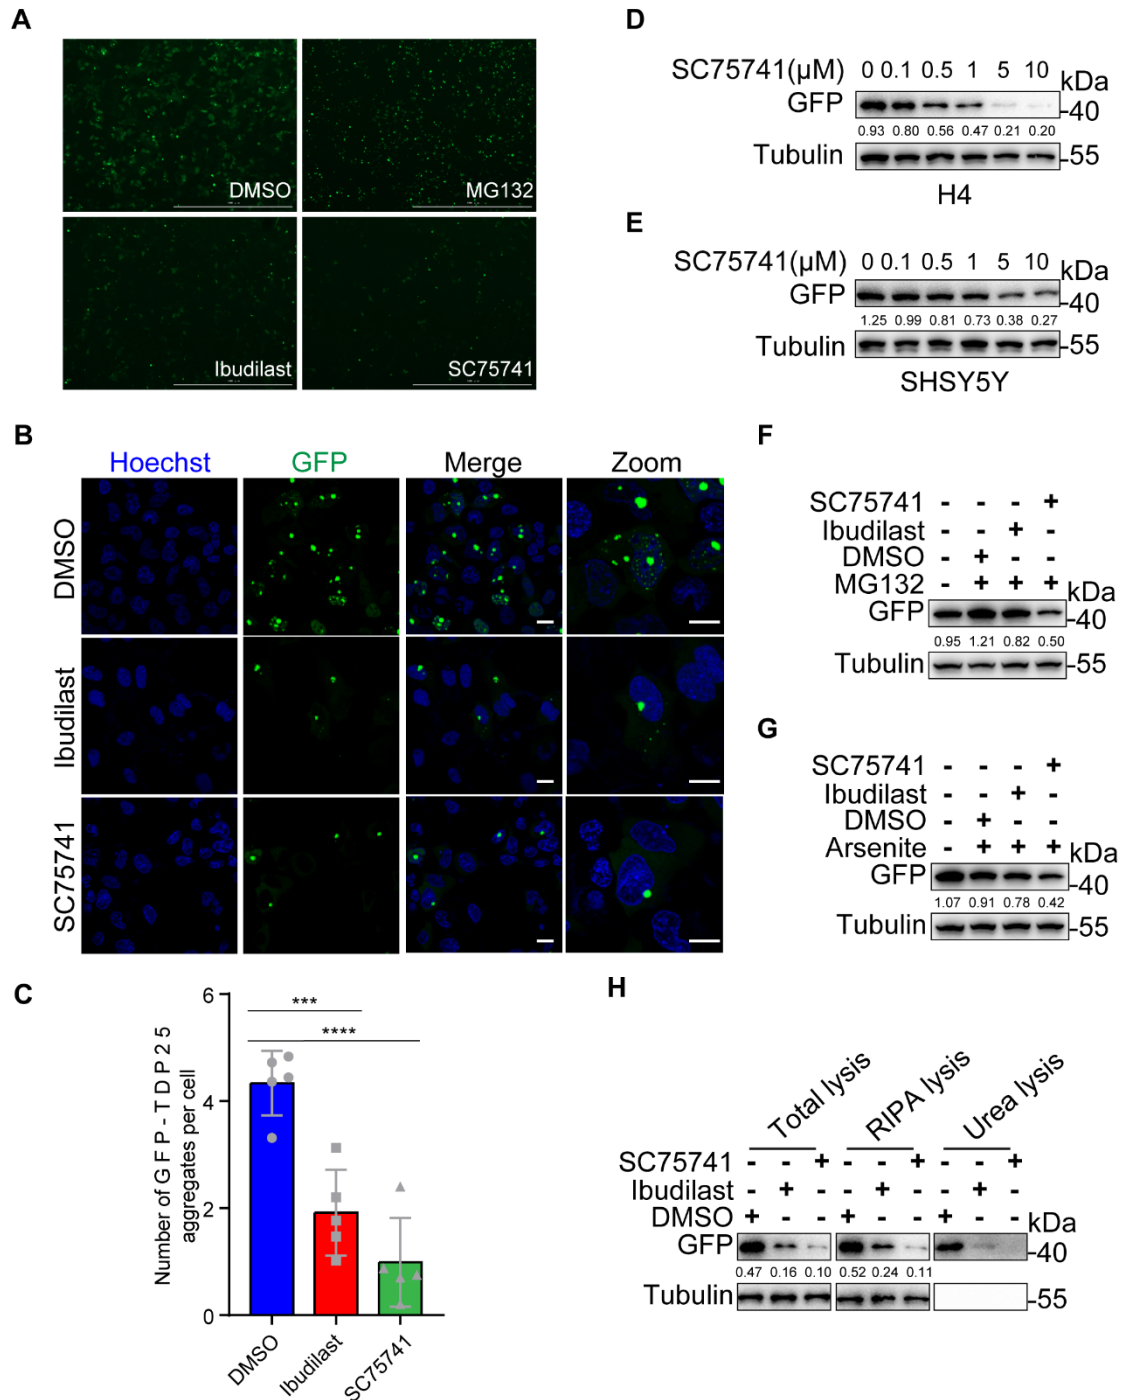

**Figure S1. Identification of SC75741 as a TDP25 degrador**

- A. High-throughput screening image, MG132 is shown as a negative control, Ibudilast is shown as a positive control, SC75741 is shown as a candidate agent.

Scale bar, 1000  $\mu\text{m}$ ;

- B. H4GT25 cells were pretreated with 1  $\mu\text{g}/\text{mL}$  DOX for 24h, treated with DMSO, ibudilast (10  $\mu\text{M}$ ) or SC75741 (5  $\mu\text{M}$ ) for another 24h, live cell imaging was performed with confocal microscopy. Scale bar, 20  $\mu\text{m}$
- C. H4GT25 cells were pretreated with 1  $\mu\text{g}/\text{mL}$  DOX for 24h, treated with DMSO, ibudilast (10  $\mu\text{M}$ ) or SC75741 (5  $\mu\text{M}$ ) for another 24h, live cell imaging was performed with confocal microscopy. Quantification of the aggregates per cell (data represents mean  $\pm$  SD; DMSO (n=190 cells), Ibudilast (n=336 cells), SC75741 (n=233 cells), \*\*\*\*p < 0.0001, \*\*\*p < 0.001, two-tailed t test).
- D. H4GT25 cells were pretreated with 1  $\mu\text{g}/\text{mL}$  DOX for 24h, treated with SC75741(0  $\mu\text{M}$ , 0.1  $\mu\text{M}$ , 0.5  $\mu\text{M}$ , 1  $\mu\text{M}$ , 5  $\mu\text{M}$  and 10  $\mu\text{M}$ ) for another 24h. Cell lysates were immunoblotted with indicated antibodies. The numbers under the blot represent the gray scale quantification (GFP/Tubulin).
- E. SH-SY5Y-GT25 cells were pretreated with 1  $\mu\text{g}/\text{mL}$  DOX for 24h, treated with SC75741(0  $\mu\text{M}$ , 0.1  $\mu\text{M}$ , 0.5  $\mu\text{M}$ , 1  $\mu\text{M}$ , 5  $\mu\text{M}$  and 10  $\mu\text{M}$ ) for another 24h. Cell lysates were immunoblotted with indicated antibodies. The numbers under the blot represent the gray scale quantification (GFP/Tubulin).
- F. H4GT25 cells were pretreated with 1  $\mu\text{g}/\text{mL}$  DOX for 24h, treated with 1  $\mu\text{M}$  MG132 for 12h, along with DMSO, ibudilast (10  $\mu\text{M}$ ) or SC75741 (5  $\mu\text{M}$ ) for 24h. Cell lysates were immunoblotted with indicated antibodies. The numbers under the blot represent the gray scale quantification (GFP/Tubulin).
- G. H4GT25 cells were pretreated with 1  $\mu\text{g}/\text{mL}$  DOX for 24h, treated with 0.5 mM arsenite for 1h, along with DMSO, ibudilast (10  $\mu\text{M}$ ) or SC75741 (5  $\mu\text{M}$ ) for 24h. Cell lysates were immunoblotted with indicated antibodies. The numbers under the blot represent the gray scale quantification (GFP/Tubulin).
- H. H4GT25 cells were pretreated with 1  $\mu\text{g}/\text{mL}$  DOX for 24h, treated with or without 5  $\mu\text{M}$  SC75741 for another 24h, total lysates, RIPA lysates and urea lysates were immunoblotted with indicated antibodies. The numbers under the blot represent the gray scale quantification (GFP/Tubulin).

Figure S2

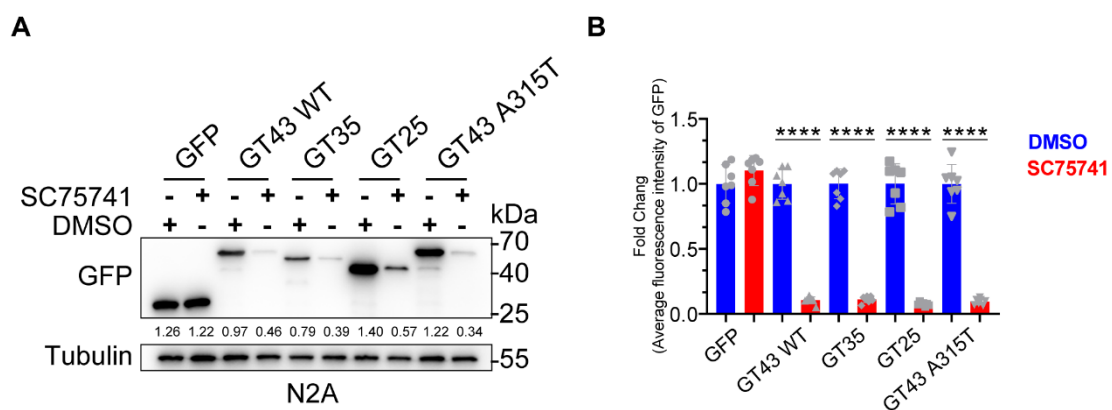

**Figure S2. SC75741 increases clearance of ALS-related pathogenic mutations-**

## induced aggregation in animal cells

- A. N2A cells were transfected with indicated plasmids for 24h, treated with or without 5  $\mu$ M SC75741 for another 24h. Cell lysates were immunoblotted with indicated antibodies. The numbers under the blot represent the gray scale quantification (GFP/Tubulin).
- B. N2A cells were transfected with indicated plasmids for 24h, treated with or without 5  $\mu$ M SC75741 for another 24h, the GFP fluorescence was analyzed by fluorescence microscopy. (data represent mean  $\pm$  SD; n = 6, \*\*\*\*p < 0.0001, two-tailed *t* test).

Figure S3

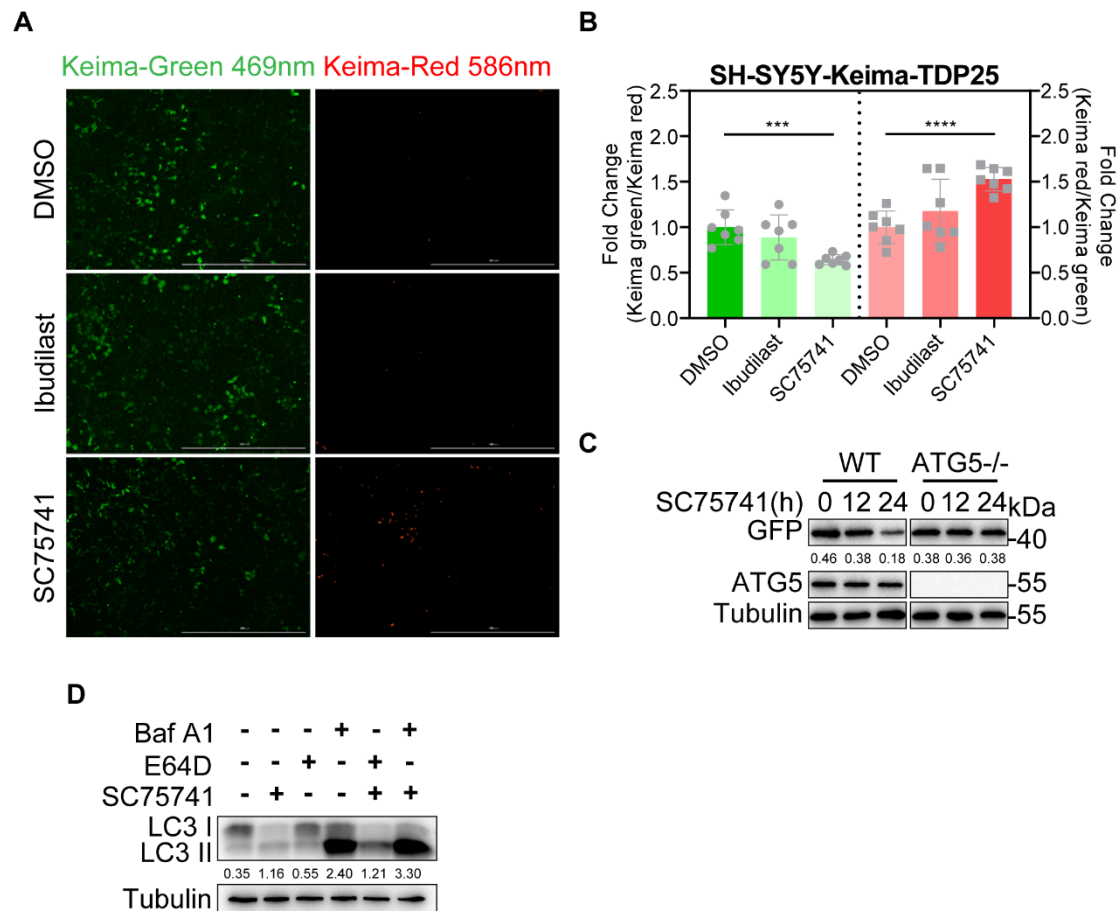

**Figure S3. SC75741 enhances autophagy via ATG5 pathway in Keima-TDP25 assays**

- A. SH-SY5YKT25 cells were pretreated with 1  $\mu$ g/mL DOX for 24h, treated with DMSO, ibudilast (10  $\mu$ M) or SC75741 (5  $\mu$ M) for another 24h, and the Keima-TDP25 fluorescence was analyzed by fluorescence microscopy.
- B. SH-SY5YKT25 cells were pretreated with 1  $\mu$ g/mL DOX for 24h, treated with DMSO, ibudilast (10  $\mu$ M) or SC75741 (5  $\mu$ M) for another 24h, and the Keima-TDP25 fluorescence was analyzed by fluorescence microscopy and compared with

cells treated with DMSO. (data represent mean  $\pm$  SD.;  $n = 7$ , \*\*\*\* $p < 0.0001$ , \*\*\* $p < 0.001$ , two-tailed  $t$  test).

- C. HEK293 WT and ATG5<sup>-/-</sup> cells were transfected with GFP-TDP25 for 24h, treated with SC75741 (5  $\mu$ M) for 12h and 24h. Cell lysates were immunoblotted with indicated antibodies. The numbers under the blot represent the gray scale quantification (GFP/Tubulin).
- D. HEK293 WT cells were treated with 5  $\mu$ M SC75741 with or without, Bafilomycin A1 (100 nM), E-64D (10  $\mu$ M) for 5h. Cell lysates were immunoblotted with indicated antibodies. The numbers under the blot represent the gray scale quantification (LC3 II/LC3 I).

Figure S4

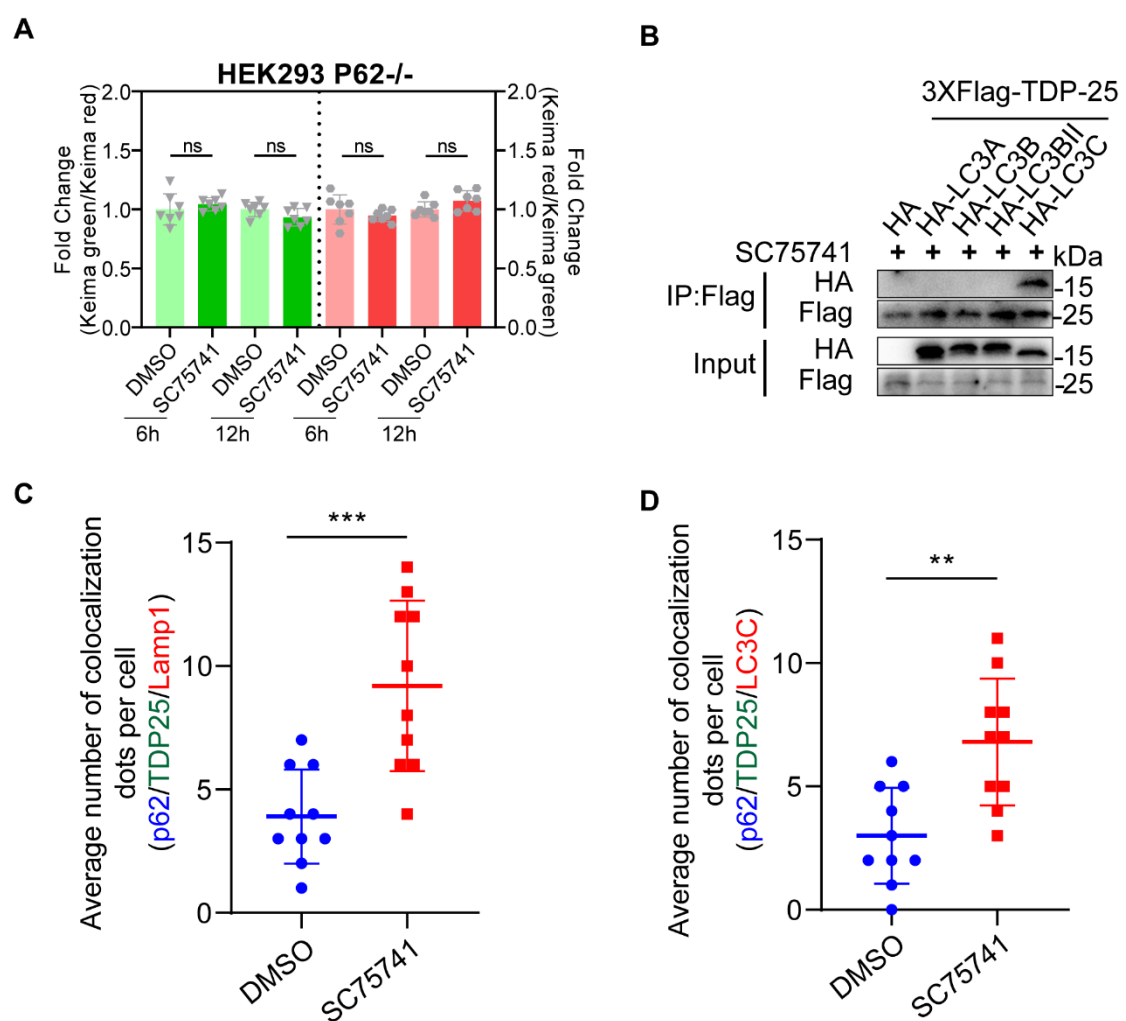

**Figure S4. SC75741-induced TDP25 degradation depends on p62 and LC3C**

- A. HEK293 P62<sup>-/-</sup> cells were transfected with Keima-TDP25, pretreated with 1  $\mu$ g/mL DOX for 24 h, treated with DMSO or 5  $\mu$ M SC75741 for 6h and 12h, and the Keima-TDP25 fluorescence was analyzed by fluorescence microscopy and

compared with cells treated with DMSO. (data represent mean  $\pm$  SD; n = 7, ns, not significant, two-tailed t test).

- B. HEK293 WT cells were transfected with Flag-TDP25 and HA-tagged ATG8 family proteins for 24h, treated with or without SC75741 (5  $\mu$ M) for another 6h, the interaction between ATG8 family proteins and TDP25 were analyzed by immunoprecipitation.
- C. Quantification of the average number of colocalization among TDP25, p62, lamp1 in cells were analyzed by two-tailed t test. (data represent mean  $\pm$  SD; DMSO (n = 10 cells), SC75741 (n = 10 cells), \*\*\*p < 0.001, two-tailed t test).
- D. Quantification of the average number of colocalization among TDP25, p62, LC3C in cells were analyzed by two-tailed t test. (data represent mean  $\pm$  SD; DMSO (n = 10 cells), SC75741 (n = 10 cells), \*\*p < 0.01, two-tailed t test).
